# Supplementary material for: SOCS2 is part of a highly prognostic 4-gene signature in AML and promotes disease aggressiveness
Source: PubMed Central journal article supplement (PMC6591510; doi:10.1038/s41598-019-45579-0), 2019-06-24
Supplement: 41598_2019_45579_MOESM1_ESM.pdf [file 41598_2019_45579_MOESM1_ESM.pdf]

**Supplementary information to the article “SOCS2 is part of a highly prognostic 4-gene signature in AML and promotes disease aggressiveness”**

Chi Huu Nguyen<sup>1,2</sup>, Tobias Glüxam<sup>1,2</sup>, Angela Schlerka<sup>1,2</sup>, Katharina Bauer<sup>1,2,3</sup>, Alexander M. Grandits<sup>1,2</sup>, Hubert Hackl<sup>4</sup>, Oliver Dovey<sup>5</sup>, Sabine Zöchbauer-Müller<sup>1,2</sup>, Jonathan L. Cooper<sup>5</sup>, George S. Vassiliou<sup>5</sup>, Dagmar Stoiber<sup>6,7</sup>, Rotraud Wieser<sup>1,2\*</sup> and Gerwin Heller<sup>1,2,8\*</sup>

<sup>1</sup>Department of Medicine I, Division of Oncology, Medical University of Vienna, Vienna, Austria. <sup>2</sup>Comprehensive Cancer Center, Vienna, Austria. <sup>3</sup>Institute of Science and Technology Austria, Vienna, Austria, <sup>4</sup>Division of Bioinformatics, Biocenter, Medical University of Innsbruck, Innsbruck, Austria. <sup>5</sup>Wellcome Trust Sanger Institute, Wellcome Trust Genome Campus, Hinxton, UK. <sup>6</sup>Ludwig Boltzmann Institute for Cancer Research, Vienna, Austria. <sup>7</sup>Institute of Pharmacology, Center for Physiology and Pharmacology, Medical University of Vienna, Vienna, Austria. <sup>8</sup>Institute of Pharmacology and Toxicology, Department for Biomedical Sciences, University of Veterinary Medicine Vienna, Vienna, Austria.

## Supplementary Methods

### Cell culture, transduction of human myeloid cell lines, and proliferation assay

The packaging cell line Phoenix-GP was maintained in DMEM (Invitrogen) supplemented with 10% fetal bovine serum (FBS) (Invitrogen) and 1% Penicillin/Streptomycin (Sigma-Aldrich). U937 and HL60 cells and their derivatives were grown in RPMI 1640 (Invitrogen) containing 10% FBS and 1% Penicillin/Streptomycin/Glutamine (Life Technologies). A codon optimized version of the human *SOCS2* cDNA was cloned into the retroviral vector pMSCV\_IRES\_GFP using the *XhoI* and *EcoRI* restriction sites. The resulting vector, pMSCV\_SOCS2\_IRES\_GFP, as well as empty pMSCV\_IRES\_GFP as a control, were transfected into Phoenix-GP cells, along with helper plasmids pMD2.G and pGag-Pol, and retroviral particles were harvested and used to infect U937 and HL60 cells through standard procedures. Three days later, the resulting cell lines U937\_Vec, U937\_SOCS2, HL60\_Vec, and HL60\_SOCS2 were sorted for GFP positivity on an Astrios (Beckman Coulter). For the proliferation assays, cells were seeded into 12-well plates at a density of  $1.5 \times 10^5$  cells/ml, split at equal ratios when necessary, and total viable cells were counted every 24 h using a CASY counter (Roche Innovates).

## Supplementary Figures

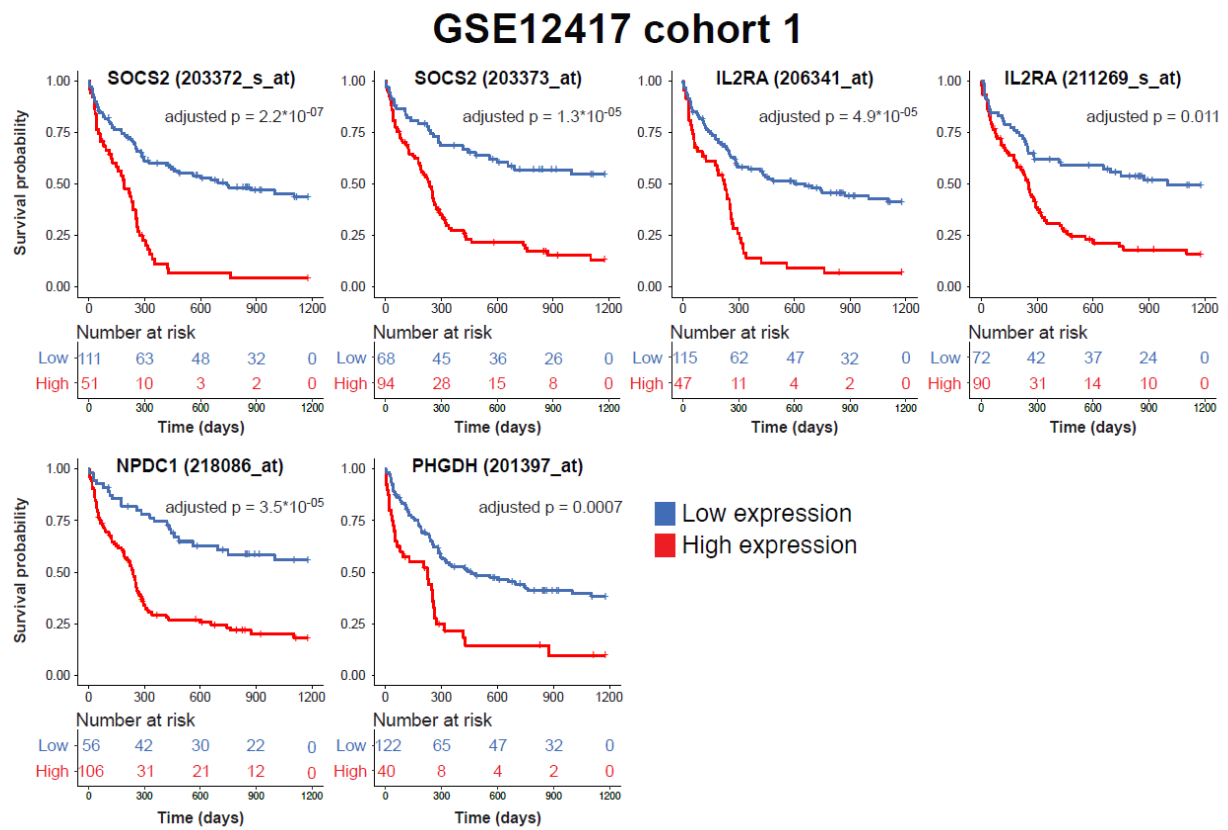

**Supplementary Figure S1.** Kaplan Meier curves for overall survival of 162 cytogenetically normal AML patients (GSE12417, cohort 1) according to expression values for alternative probe sets for *SOCS2*, *IL2RA*, *NPDC1* and *PHGDH*. Expression values were dichotomized by maximally selected rank statistics. Statistical significance was calculated using the log rank test and p-values were adjusted for multiple testing as described by Altman *et al.* <sup>1</sup>.

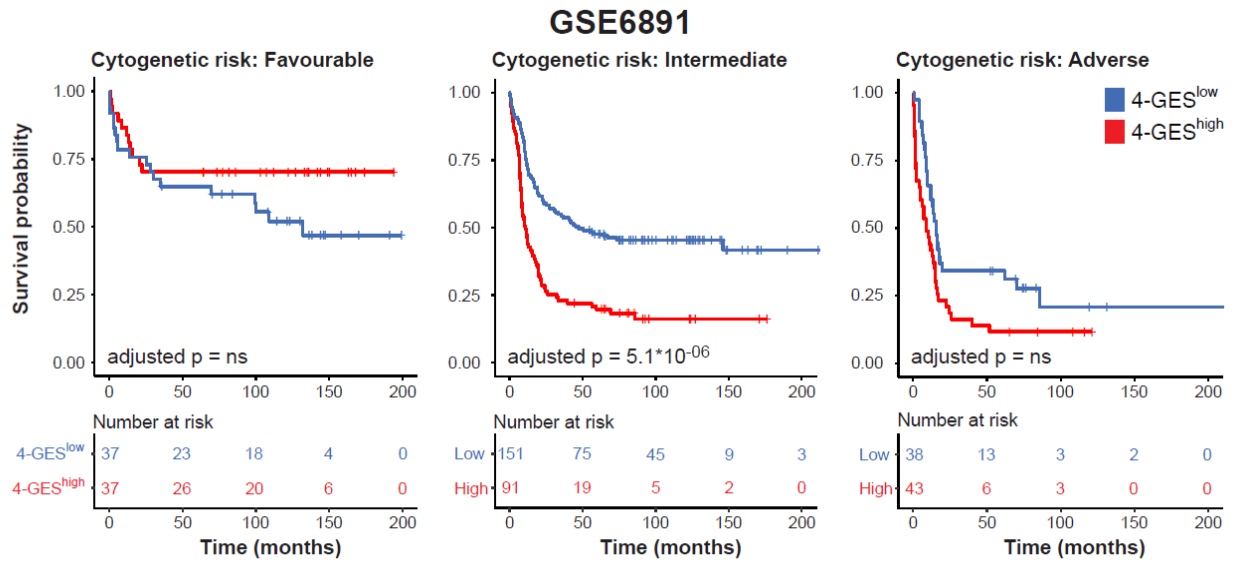

**Supplementary Figure S2.** Kaplan Meier curves for overall survival of AML patients classified as cytogenetically favourable, intermediate, or adverse (GSE6891, combined cohorts 1 and 2). Patients were stratified into 4-GES<sup>low</sup> (blue) and 4-GES<sup>high</sup> (red) subgroups. Statistical significance was calculated using the log rank test and p-values were adjusted for multiple testing as described by Altman *et al.* <sup>1</sup>.

**A****GSE37642**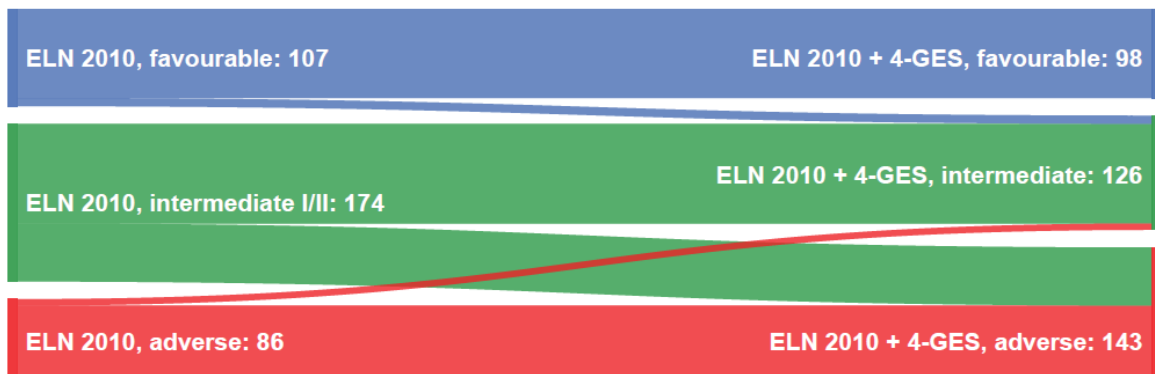**B**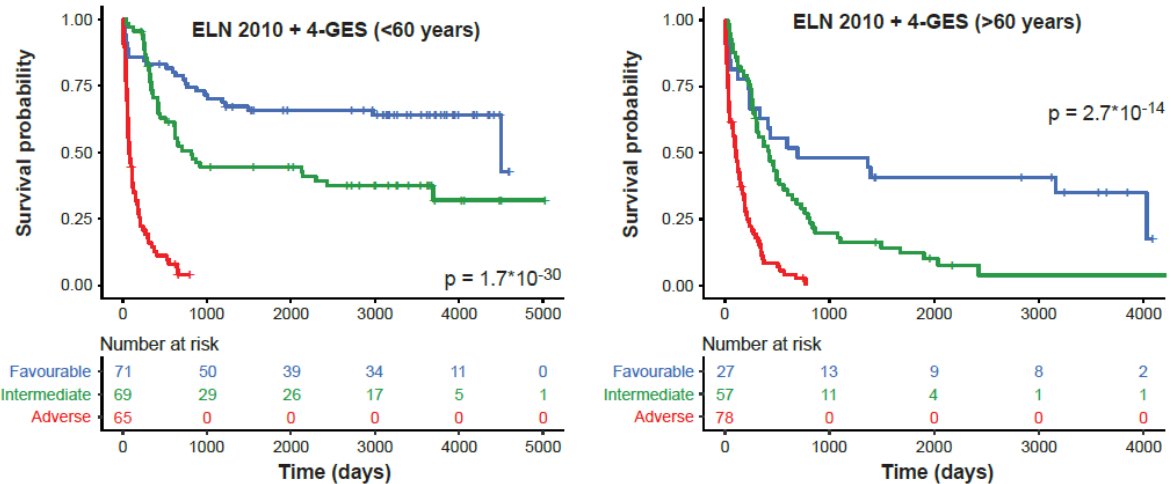

**Supplementary Figure S3.** The 4-GES is able to refine the ELN classification of AML patients included in the GSE37642 data set. **(A)** A shift of patients from ELN 2010 favourable, intermediate I/II and adverse (left side) to ELN 2010 + 4-GES favourable, intermediate and adverse (right side) is shown. ELN favourable/4-GES<sup>high</sup> patients with low median OS were re-assigned to ELN intermediate risk group, ELN intermediate/4-GES<sup>high</sup> patients with low median OS were re-assigned to ELN adverse risk group, and ELN adverse/4-GES<sup>low</sup> patients with high median OS were re-assigned to ELN intermediate risk group. **(B)** Kaplan Meier curves for overall survival of AML patients <60 years of age (left) and >60 years of age (right) stratified into favourable, intermediate, and adverse risk based on the ELN 2010 + 4-GES classification. ELN, European Leukemia Net.

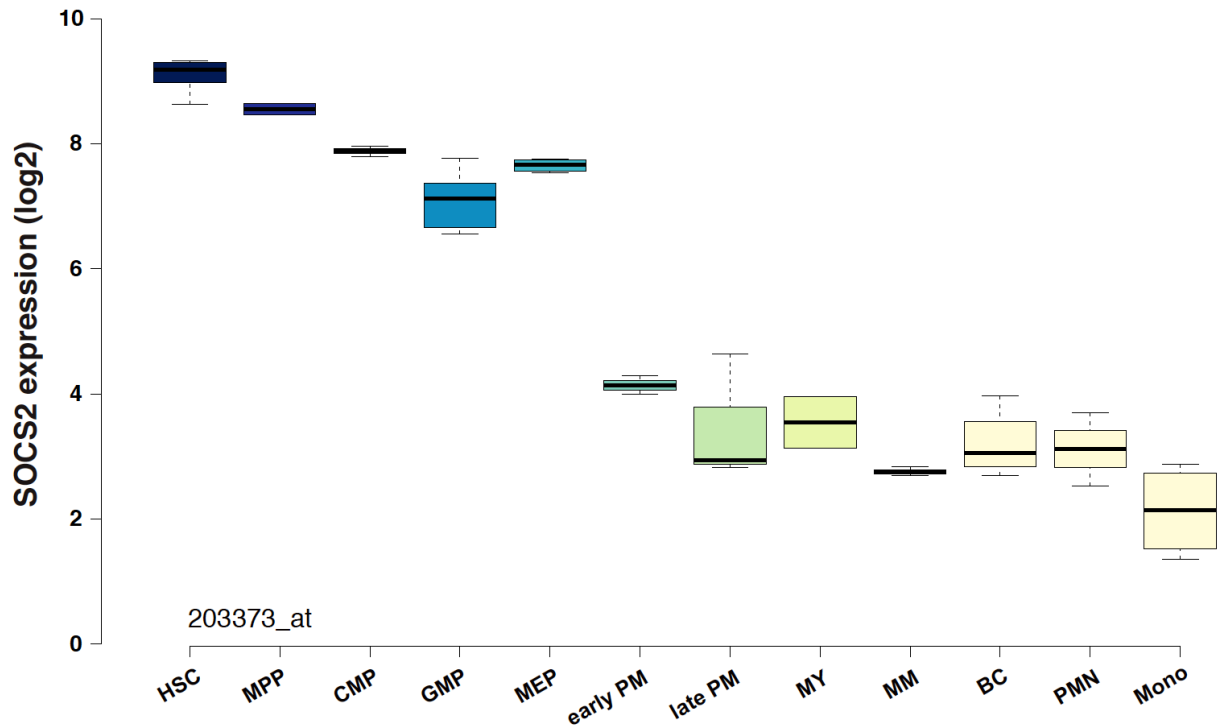

**Supplementary Figure S4.** SOCS2 (Affymetrix probe set: 203373\_at) expression in various hematopoietic cells determined by gene expression microarray analyses. Log<sub>2</sub> transformed gene expression values are shown. HSC, Hematopoietic stem cell; MPP, Multipotential progenitors; CMP, Common myeloid progenitor cell; GMP, Granulocyte monocyte progenitors; MEP, Megakaryocyte-erythroid progenitor cell; early\_PM, Early Promyelocyte; late\_PM, Late Promyelocyte; MY, Myelocyte; MM, Metamyelocytes; BC, Band cell; PMN, Polymorphonuclear cells; Mono, Monocytes

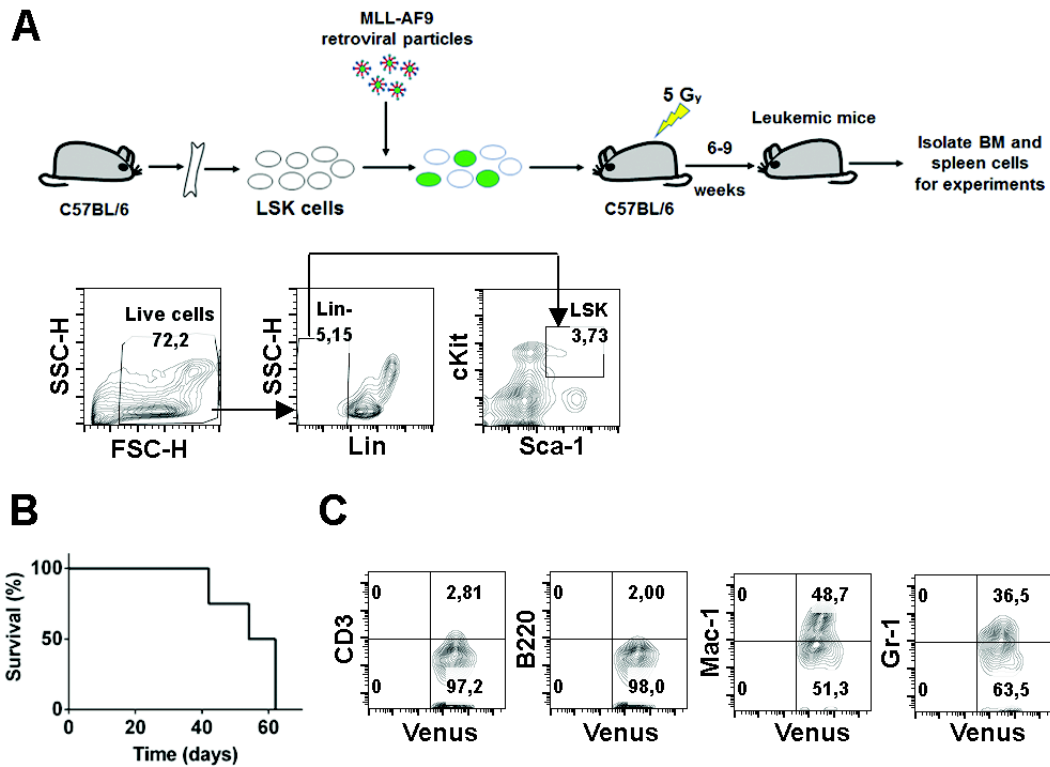

**Supplementary Figure S5.** *MLL-AF9*-transduced LSK cells cause an aggressive AML-like disease in mice. **(A)** Schematic overview of the experiment. **(B)** Kaplan Meier plot of mice transplanted with *MLL-AF9*-transduced LSK cells (160,000 unsorted cells per mouse,  $n = 3$ ). **(C)** Flow cytometric analysis of spleen cells from terminally ill mice confirmed the expression of myeloid (Mac-1, Gr-1) and the absence of lymphoid (CD3, B220) markers in LCs (Venus<sup>+</sup> cells; representative experiment).

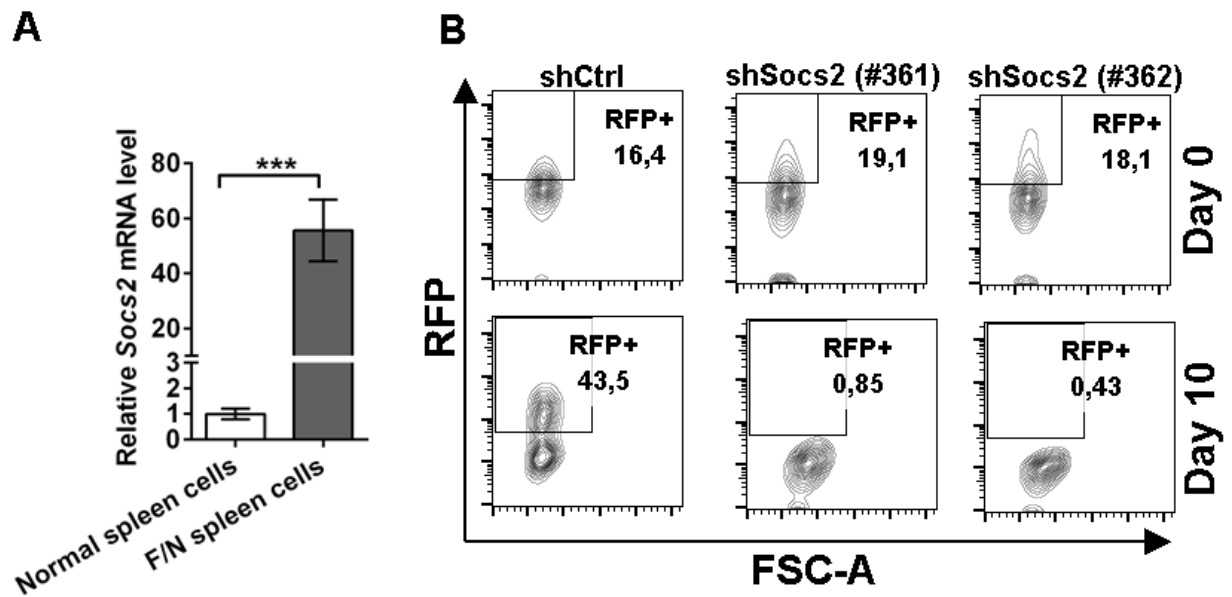

**Supplementary Figure S6.** *Socs2* is required for proliferation and/or survival of *Flt3-ITD/NPM1c* LCs *in vitro*. **(A)** *Socs2* mRNA levels in spleen cells from *Flt3-ITD/NPM1c* (F/N) leukemic mice and from healthy mice were determined by qRT-PCR and normalised to those of the housekeeping gene  *$\beta$ -2-microglobulin* using the  $\Delta\Delta C_T$  method. Mean  $\pm$  SEM of three independent experiments; \*\*\*,  $p < 0.001$  (Student's two-tailed t-test). **(B)** Representative flow cytometric analysis of RFP<sup>+</sup> cells from shCtrl or sh*Socs2* transduced *Flt3-ITD/NPM1c* LCs. Upper panel, cells on the day of sorting (day 0); lower panel, sorted cells after 10 days in suspension culture (day 10).



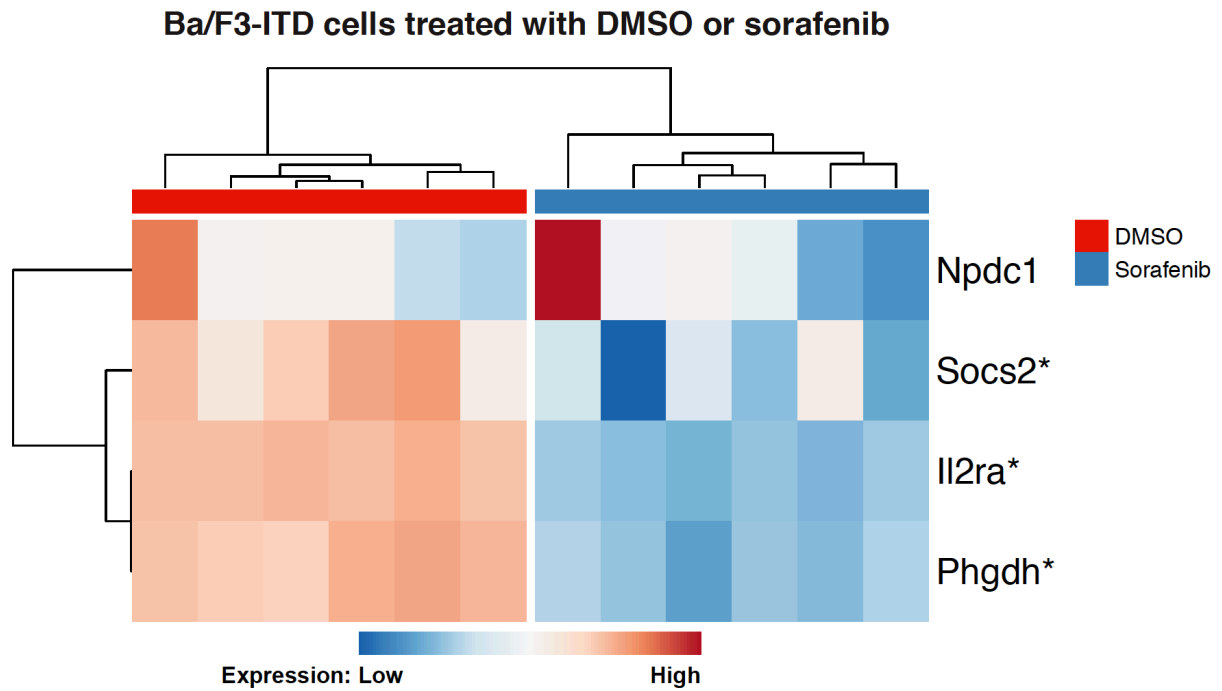

**Supplementary Figure S7.** Expression of *Npdc1*, *Socs2*, *Il2ra* and *Phgdh* in DMSO (n = 6) or sorafenib (n = 6) treated Ba/F3-ITD cells determined using MoGene-1\_0-st-v1 microarrays (ArrayExpress ID: E-MTAB-4487). Ba/F3-ITD cells were treated with DMSO or 10nM sorafenib for 24 hours. Log<sub>2</sub> transformed gene expression values are shown (blue, low expression; red, high expression). Asterisks indicate statistically significant differences in gene expression between DMSO and sorafenib treated cells (FDR < 0.005).

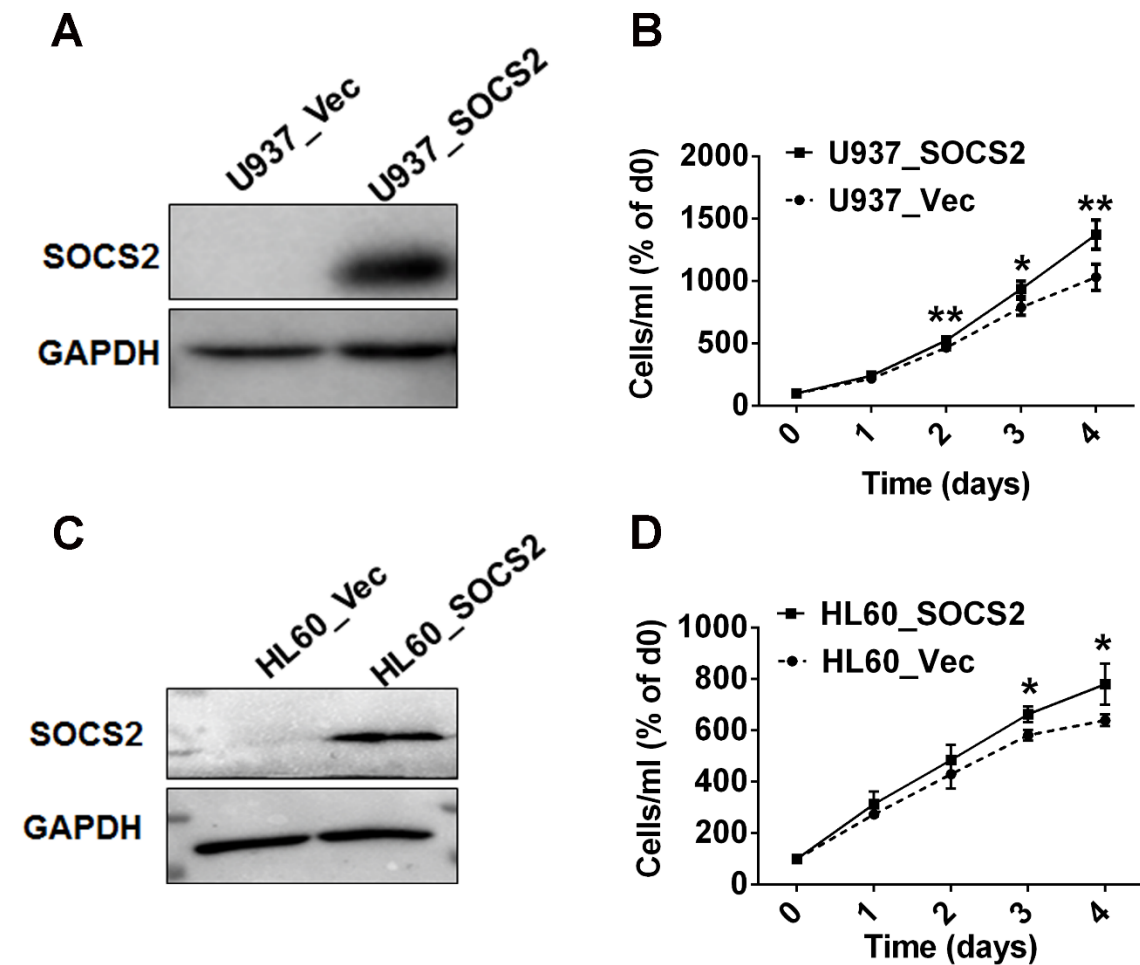

**Supplementary Figure S8.** Experimental expression of *SOCS2* promotes proliferation of the malignant human myeloid cell lines U937 (**A**, **B**) and HL60 (**C**, **D**). (**A**, **C**) Immunoblot analyses demonstrating expression of *SOCS2* in U937\_SOCS2 and HL60\_SOCS2, but not U937\_Vec and HL60\_Vec cells. (**B**, **D**) Relative counts of U937\_SOCS2, U937\_Vec, HL60\_SOCS2, and HL60\_Vec cells over a period of 4 days. Mean  $\pm$  SEM of three independent experiments. \*,  $p < 0.05$ ; \*\*,  $p < 0.01$  (2-way ANOVA followed by Bonferroni's post-hoc test).

**Supplementary Table S1.** Univariable Cox regression analysis for overall survival of AML patients

| Data set                             | Variable                                       | HR   | 95% CI     | p-value                     |
|--------------------------------------|------------------------------------------------|------|------------|-----------------------------|
| <b>GSE12417 cohort 1</b>             | 4-GES <sup>high</sup> vs. 4-GES <sup>low</sup> | 4.09 | 2.52-6.64  | <b>1.3*10<sup>-08</sup></b> |
|                                      | Age (years)                                    | 1.03 | 0.76-0.97  | <b>0.0005</b>               |
|                                      | FAB, M1 vs. others                             | 1.44 | 0.51-4.07  | 0.491                       |
|                                      | FAB, M2 vs. others                             | 1.1  | 0.39-3.12  | 0.858                       |
|                                      | FAB, M4 vs. others                             | 0.71 | 0.24-2.07  | 0.533                       |
|                                      | FAB, M5 vs. others                             | 0.82 | 0.26-2.58  | 0.735                       |
|                                      | FAB, M6 vs. others                             | 0.61 | 0.14-2.72  | 0.516                       |
| <b>GSE12417 cohort 2<sup>a</sup></b> | 4-GES <sup>high</sup> vs. 4-GES <sup>low</sup> | 4.93 | 1.19-20.35 | <b>0.027</b>                |
|                                      | Age (years)                                    | 1.04 | 1.01-1.06  | <b>0.006</b>                |
| <b>GSE6891 cohort 1</b>              | 4-GES <sup>high</sup> vs. 4-GES <sup>low</sup> | 2.33 | 1.68-3.25  | <b>4.5*10<sup>-07</sup></b> |
|                                      | Age (years)                                    | 1.01 | 0.99-1.03  | 0.066                       |
|                                      | FAB, M1 vs. others                             | 0.5  | 0.2-1.28   | 0.149                       |
|                                      | FAB, M2 vs. others                             | 0.46 | 0.18-1.17  | 0.103                       |
|                                      | FAB, M4 vs. others                             | 0.48 | 0.18-1.24  | 0.127                       |
|                                      | FAB, M5 vs. others                             | 0.68 | 0.27-1.72  | 0.419                       |
|                                      | FAB, M6 vs. others                             | 0.16 | 0.02-1.41  | 0.1                         |
|                                      | Cytogenetic risk <sup>b</sup>                  | 1.96 | 1.55-2.46  | <b>1.2*10<sup>-08</sup></b> |
|                                      | Sex                                            | 1.22 | 0.89-1.68  | 0.226                       |
|                                      | <i>FLT3</i> -ITD                               | 1.82 | 1.29-2.56  | <b>0.0007</b>               |
|                                      | <i>FLT3</i> -TKD                               | 0.72 | 0.42-1.25  | 0.248                       |
|                                      | <i>IDH1</i>                                    | 0.66 | 0.32-1.35  | 0.252                       |
|                                      | <i>IDH2</i>                                    | 1.15 | 0.65-2.04  | 0.627                       |
|                                      | <i>KRAS</i>                                    | 0.92 | 0.23-3.7   | 0.903                       |
|                                      | <i>NRAS</i>                                    | 0.63 | 0.36-1.12  | 0.116                       |
|                                      | <i>NPM1c</i>                                   | 0.81 | 0.57-1.15  | 0.241                       |
|                                      | <i>CEBPA</i> (wt/mono/bi)                      | 0.67 | 0.46-0.98  | <b>0.04</b>                 |
|                                      | <i>CEBPA</i> (yes/no)                          | 0.46 | 0.2-0.97   | <b>0.042</b>                |
|                                      | <i>EVII</i> expression                         | 1.81 | 1.09-3.01  | <b>0.022</b>                |
| <b>GSE6891 cohort 2</b>              | 4-GES <sup>high</sup> vs. 4-GES <sup>low</sup> | 2.48 | 1.7-3.62   | <b>2.5*10<sup>-06</sup></b> |
|                                      | Age (years)                                    | 1.02 | 1-1.03     | <b>0.017</b>                |

|                  |                                                |      |            |                             |
|------------------|------------------------------------------------|------|------------|-----------------------------|
|                  | FAB, M1 vs. others                             | 0.67 | 0.3-1.48   | 0.319                       |
|                  | FAB, M2 vs. others                             | 0.7  | 0.32-1.53  | 0.368                       |
|                  | FAB, M4 vs. others                             | 0.64 | 0.29-1.44  | 0.285                       |
|                  | FAB, M5 vs. others                             | 0.67 | 0.3-1.49   | 0.325                       |
|                  | FAB, M6 vs. others                             | 0.78 | 0.17-3.69  | 0.755                       |
|                  | Cytogenetic risk <sup>b</sup>                  | 1.57 | 1.14-2.16  | <b>0.005</b>                |
|                  | Sex                                            | 0.91 | 0.63-1.33  | 0.64                        |
|                  | <i>FLT3</i> -ITD                               | 1.44 | 0.97-2.15  | 0.072                       |
|                  | <i>FLT3</i> -TKD                               | 0.67 | 0.33-1.38  | 0.275                       |
|                  | <i>IDH1</i>                                    | 1.15 | 0.6-2.2    | 0.672                       |
|                  | <i>IDH2</i>                                    | 0.59 | 0.29-1.22  | 0.158                       |
|                  | <i>NRAS</i>                                    | 0.98 | 0.54-1.78  | 0.942                       |
|                  | <i>NPM1c</i>                                   | 0.96 | 0.64-1.44  | 0.86                        |
|                  | <i>CEBPA</i> (wt/mono/bi)                      | 0.76 | 0.47-1.22  | 0.255                       |
|                  | <i>CEBPA</i> (yes/no)                          | 0.68 | 0.3-1.55   | 0.361                       |
|                  | <i>EVII</i> expression                         | 3.52 | 1.85-6.69  | <b>0.0001</b>               |
| <b>GSE37642</b>  | 4-GES <sup>high</sup> vs. 4-GES <sup>low</sup> | 2.65 | 2.04-3.45  | <b>3.1*10<sup>-13</sup></b> |
|                  | Age (years)                                    | 1.04 | 1.03-1.05  | <b>2.9*10<sup>-14</sup></b> |
|                  | FAB, M2 vs. others                             | 0.75 | 0.54-1.03  | 0.077                       |
|                  | FAB, M4 vs. others                             | 0.51 | 0.36-0.72  | <b>0.0001</b>               |
|                  | FAB, M5 vs. others                             | 0.92 | 0.62-1.36  | 0.669                       |
|                  | FAB, M6 vs. others                             | 0.78 | 0.41-1.48  | 0.449                       |
|                  | FAB, M7 vs. others                             | 1.92 | 0.47-7.86  | 0.366                       |
|                  | ELN score <sup>c</sup>                         | 1.43 | 0.7-1.28   | <b>2.3*10<sup>-11</sup></b> |
| <b>TCGA_LAML</b> | 4-GES <sup>high</sup> vs. 4-GES <sup>low</sup> | 1.91 | 1.28-2.86  | <b>0.0016</b>               |
|                  | Age (years)                                    | 1.04 | 0.97-1.02  | <b>1.1*10<sup>-05</sup></b> |
|                  | FAB, M1 vs. others                             | 1.14 | 0.54-2.39  | 0.737                       |
|                  | FAB, M2 vs. others                             | 1.12 | 0.53-2.37  | 0.766                       |
|                  | FAB, M4 vs. others                             | 1.14 | 0.55-2.28  | 0.72                        |
|                  | FAB, M5 vs. others                             | 1.56 | 0.67-3.62  | 0.303                       |
|                  | FAB, M6 vs. others                             | 2.71 | 0.59-12.55 | 0.202                       |
|                  | FAB, M7 vs. others                             | 2.61 | 0.71-9.59  | 0.149                       |
|                  | Cytogenetic risk <sup>a</sup>                  | 1.55 | 1.08-2.23  | <b>0.017</b>                |

|  |                  |      |           |       |
|--|------------------|------|-----------|-------|
|  | Sex              | 1    | 0.67-1.5  | 0.97  |
|  | <i>FLT3</i> -ITD | 0.97 | 0.49-1.93 | 0.934 |
|  | <i>FLT3</i> -TKD | 1.47 | 0.71-3.04 | 0.3   |
|  | <i>IDH1</i>      | 0.69 | 0.4-1.18  | 0.178 |
|  | <i>RAS</i>       | 0.78 | 0.31-1.92 | 0.584 |
|  | <i>NPM1c</i>     | 1.01 | 0.65-1.57 | 0.955 |

4-GES, 4-gene expression score; HR, hazard ratio; CI, confidence interval; FAB, French American British classification; <sup>a</sup>, FAB classification of GSE12417 cohort 2 was excluded from univariable analyses because of low subgroup sample numbers; *FLT3*-ITD, *FLT3* internal tandem duplication; *FLT3*-TKD, *FLT3* tyrosine kinase domain mutation; gene names in italics refer to mutations of the respective genes; mono, monoallelic; bi, biallelic. <sup>b</sup>, Assignment to cytogenetic risk groups were included in the respective GEO entries. <sup>c</sup>, Assignment to ELN risk groups was provided by T. Herold, University of Munich, Department of Internal Medicine III, Munich, Germany. No relevant patient data were provided in GSE71014; therefore, regression analyses were not performed.

**Supplementary Table S2.** Antibodies used for immunoblot analysis and flow cytometry

| Method | Target            | Clone/source organism | Fluorophor/conjugate   | Company                | Cat. no   | Dilution |
|--------|-------------------|-----------------------|------------------------|------------------------|-----------|----------|
| IB     | Human/mouse SOCS2 | Rabbit                | -                      | Cell Signaling         | 2779S     | 1:1,000  |
|        | Human/mouse GAPDH | 14C10                 | -                      | Cell Signaling         | 2118S     | 1:50,000 |
|        | Rabbit IgG        | Goat                  | Horseradish peroxidase | Jackson ImmunoResearch | 111035008 | 1:5,000  |
| FC     | Mouse Gr-1        | RB6-8C5               | AF700                  | Biolegend              | 108422    | 1:100    |
|        | Mouse Mac-1       | M1/70                 | AF700                  | Biolegend              | 101222    | 1:100    |
|        | Mouse CD3         | 17A2                  | AF700                  | Biolegend              | 100216    | 1:100    |
|        | Mouse B220        | RA3-6B22              | AF700                  | Biolegend              | 103232    | 1:100    |
|        | Mouse Ter119      | TER119                | AF700                  | Biolegend              | 116220    | 1:100    |
|        | Mouse c-Kit       | 2B8                   | PE                     | Biolegend              | 105808    | 1:50     |
|        | Mouse c-Kit       | 2B8                   | APC-Cy7                | Biolegend              | 105826    | 1:50     |
|        | Mouse Sca-1       | D7                    | BV421                  | BD Bioscience          | 562729    | 1:50     |
|        | Mouse Sca-1       | D7                    | PerCP/Cy5.5            | Biolegend              | 122524    | 1:50     |
|        | Mouse CD34        | RAM34                 | FITC                   | eBioscience            | 11034182  | 1:50     |
|        | Mouse CD34        | MEC14.7               | PE/Cy5.5               | Biolegend              | 119312    | 1:50     |
|        | Mouse CD16/CD32   | 93                    | PE/Cy7                 | eBioscience            | 25016182  | 1:50     |
|        | Mouse Ki-67       | 16A8                  | APC                    | Biolegend              | 652406    | 1:50     |

IB, immunoblot analysis; FC, flow cytometry. Gr-1, Mac-1, CD3, B220, and Ter119 antibodies were combined to define Lin<sup>-</sup> cells.

**Supplementary Table S3.** Genes included in the 4-GES and in 3 published gene expression signatures

| <b>4-GES</b> | <b>L-24</b>     | <b>M-7</b>      | <b>W-3</b>     |
|--------------|-----------------|-----------------|----------------|
| <i>IL2RA</i> | <i>ALS2CR8</i>  | <i>CD34</i>     | <i>CAP1</i>    |
| <i>NPDC1</i> | <i>ANGEL1</i>   | <i>F2RL1</i>    | <i>CXCR6</i>   |
| <i>PHGDH</i> | <i>ARL6IP5</i>  | <i>FAM92A1</i>  | <i>FAM124B</i> |
| <i>SOCS2</i> | <i>BSPRY</i>    | <i>MIR155HG</i> |                |
|              | <i>BTBD3</i>    | <i>RHOC</i>     |                |
|              | <i>C1RL</i>     | <i>SCRNI</i>    |                |
|              | <i>CPT1A</i>    | <i>VWA8</i>     |                |
|              | <i>DAPK1</i>    |                 |                |
|              | <i>ETFB</i>     |                 |                |
|              | <i>FGFR1</i>    |                 |                |
|              | <i>HEATR6</i>   |                 |                |
|              | <i>LAPTM4B</i>  |                 |                |
|              | <i>MAP7</i>     |                 |                |
|              | <i>NDFIP1</i>   |                 |                |
|              | <i>PBX3</i>     |                 |                |
|              | <i>PLA2G4A</i>  |                 |                |
|              | <i>PLOD3</i>    |                 |                |
|              | <i>PTP4A3</i>   |                 |                |
|              | <i>SLC25A12</i> |                 |                |
|              | <i>SLC2A5</i>   |                 |                |
|              | <i>TMEM159</i>  |                 |                |
|              | <i>TRIM44</i>   |                 |                |
|              | <i>TRPS1</i>    |                 |                |
|              | <i>VAV3</i>     |                 |                |

L-24, 24-gene expression signature by Li et al. <sup>2</sup>; M-7, 7-gene expression signature

by Marcucci et al. <sup>3</sup>; W-3, 3-gene expression signature by Wilop et al. <sup>4</sup>

**Supplementary Table S4.** Univariable Cox regression analysis for overall survival of AML patients with respect to the 4-GES and 3 published gene expression signatures

| Data set           | 4-GES       |                             | L-24        |                | M-7         |                             | W-3         |              |
|--------------------|-------------|-----------------------------|-------------|----------------|-------------|-----------------------------|-------------|--------------|
|                    | HR          | p                           | HR          | p              | HR          | p                           | HR          | p            |
| GSE12417, cohort 1 | <b>4.09</b> | <b>1.3*10<sup>-08</sup></b> | <b>2.19</b> | <b>0.00012</b> | na          | na                          | <b>1.47</b> | <b>0.03</b>  |
| GSE12417, cohort 2 | <b>4.93</b> | <b>0.027</b>                | 1.63        | 0.097          | <b>2.68</b> | <b>0.001</b>                | <b>1.97</b> | <b>0.016</b> |
| GSE37642           | <b>2.62</b> | <b>1.2*10<sup>-13</sup></b> | <b>1.59</b> | <b>0.00011</b> | na          | na                          | 1.15        | 0.171        |
| GSE6891, cohort1   | <b>2.34</b> | <b>4.5*10<sup>-07</sup></b> | <b>1.71</b> | <b>0.001</b>   | <b>1.95</b> | <b>6.3*10<sup>-05</sup></b> | 1.34        | 0.082        |
| GSE6891, cohort2   | <b>2.48</b> | <b>2.4*10<sup>-06</sup></b> | <b>1.69</b> | <b>0.007</b>   | <b>1.63</b> | <b>0.011</b>                | 1.26        | 0.249        |
| GSE71014           | <b>3.28</b> | <b>0.002</b>                | 1.74        | 0.102          | <b>2.7</b>  | <b>0.005</b>                | 1.37        | 0.418        |
| TCGA_LAML          | <b>1.91</b> | <b>0.002</b>                | <b>1.78</b> | <b>0.006</b>   | 1.16        | 0.471                       | <b>2.19</b> | <b>0.01</b>  |

L-24, 24-gene expression signature by Li et al. <sup>2</sup>; M-7, 7-gene expression signature by Marcucci et al. <sup>3</sup>; W-3, 3-gene expression signature by Wilop et al. <sup>4</sup>; HR, hazard ratio; na, not applicable (2 signature genes not represented on U133A arrays). Significant p-values and corresponding HRs are indicated in bold.



Addendum to main Figure 5B: full length blot image

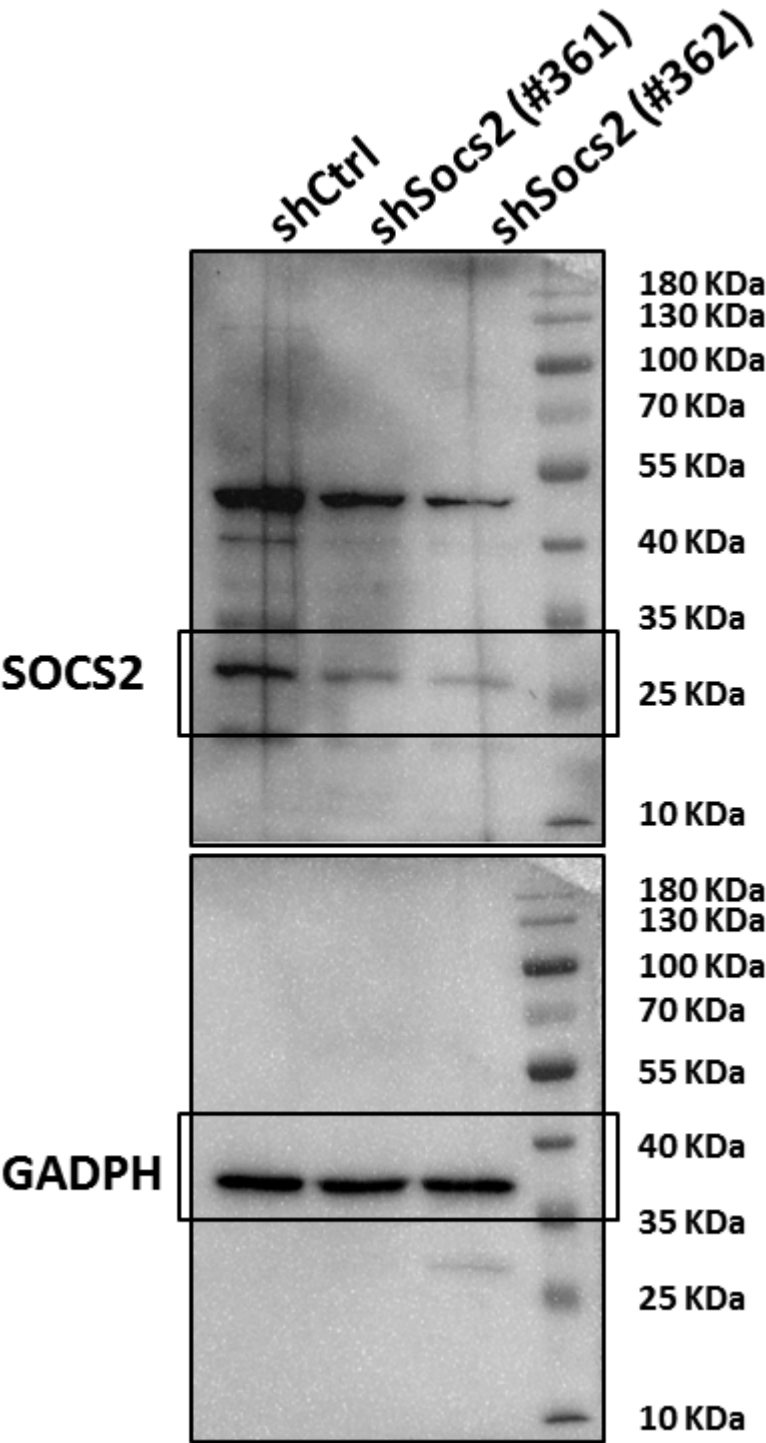

Addendum to supplementary Figures S8A and S8C: full length blot images

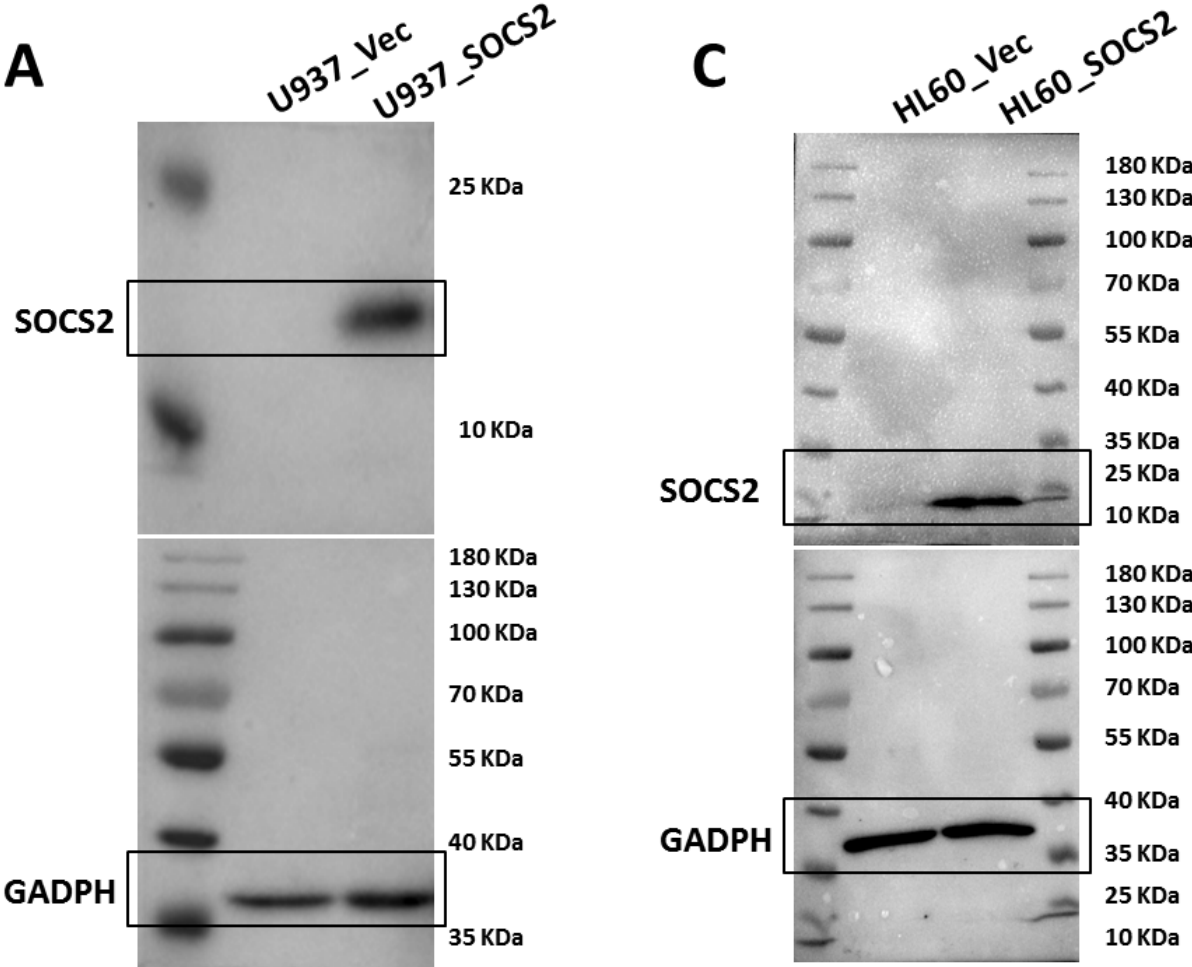

## Supplementary References

- 1 Altman, D. G., Lausen, B., Sauerbrei, W. & Schumacher, M. Dangers of using "optimal" cutpoints in the evaluation of prognostic factors. *J Natl Cancer Inst* **86**, 829-835 (1994).
- 2 Li, Z. *et al.* Identification of a 24-gene prognostic signature that improves the European LeukemiaNet risk classification of acute myeloid leukemia: an international collaborative study. *J Clin Oncol* **31**, 1172-1181, doi:10.1200/JCO.2012.44.3184 (2013).
- 3 Marcucci, G. *et al.* Epigenetics meets genetics in acute myeloid leukemia: clinical impact of a novel seven-gene score. *J Clin Oncol* **32**, 548-556, doi:10.1200/JCO.2013.50.6337 (2014).
- 4 Wilop, S. *et al.* A three-gene expression-based risk score can refine the European LeukemiaNet AML classification. *J Hematol Oncol* **9**, 78, doi:10.1186/s13045-016-0308-8 (2016).
